# Supplementary material
Source: publisher figshare collection journal article supplement (https://karger.figshare.com/articles/dataset/_/5241523)
Supplement: Supplementary file 1 [file 1]

## Erratum

---

In the article by Mullane et al., entitled 'Renal impairment and clinical outcomes of *Clostridium difficile* infection in two randomized trials' [Am J Nephrol 2013;38:1–11], the following minor errors occurred in the Results section on page 6 in the text, left side:

- line 2: 'elevated WBCs' should read 'CKD stage levels 3–4'
- line 5: 'Patients with stage 2' should read 'Patients with stage 3'
- lines 8–9: ' $p = 0.024$ ' should read ' $p < 0.02$ '
- line 13: ' $p = 0.001$ ' should read ' $p \leq 0.001$ '

as well as in the Discussion section on page 9, column 2, paragraph 3:

- lines 10–15:

'After adjusting for age, treatment arm, and WBCs, age and WBCs were independently and significantly associated with death. Each 10-year increase in age increased the odds of death by 54% and WBCs  $>15 \times 10^9/l$  nearly doubled the odds of death.'

Which should read:

'After adjusting for age, treatment arm, and WBCs, only age was independently and significantly associated with death. In the multivariate analysis, age was significantly associated with death (OR = 1.47, CI: 1.12–1.92,  $p < 0.006$ ). Each 10-year increase in age increased the odds of death by 54%.'

The authors regret any inconveniences these errors might have caused.
